# Supplementary material for: Enhanced recovery after elective caesarean: a rapid review of clinical protocols, and an umbrella review of systematic reviews
Source: PubMed Central journal article supplement (PMC5359888; doi:10.1186/s12884-017-1265-0), 2017-03-20
Supplement: 12884_2017_1265_MOESM2_ESM.pdf [file 12884_2017_1265_MOESM2_ESM.pdf]

Additional file 2 – Fig 1: Eligible studies for ERAS packages in elective caesarean

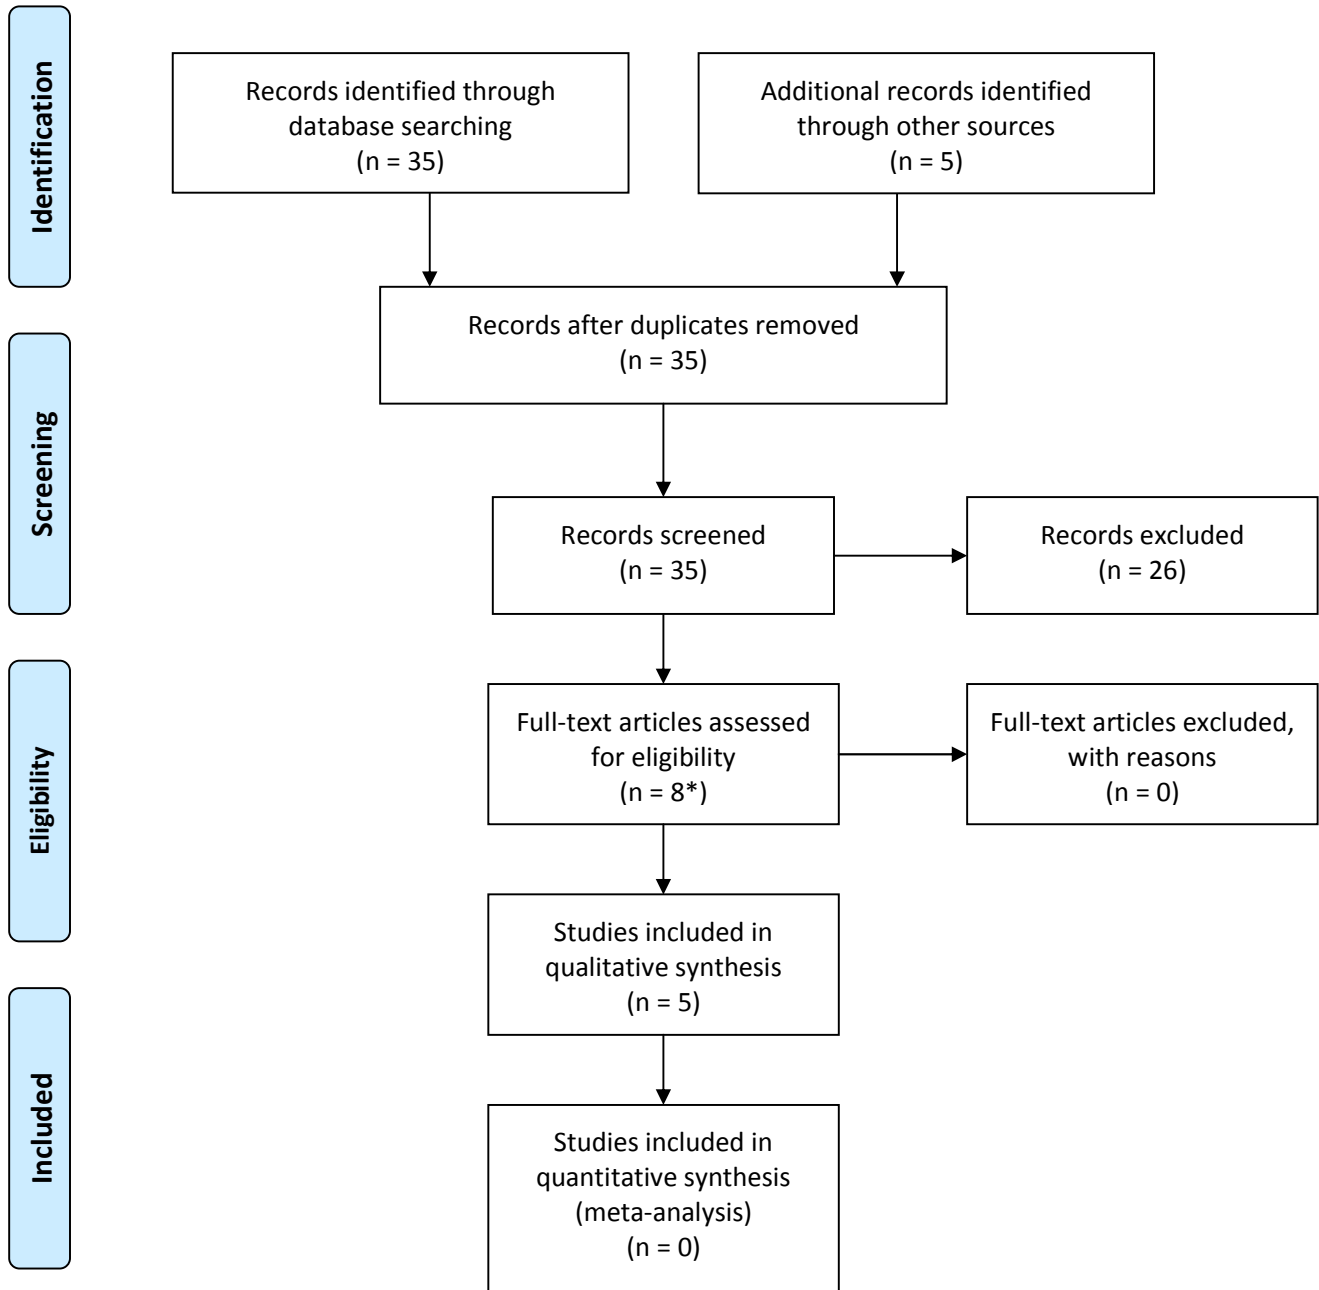

\* Note that of the 8 full text articles, 5 covered 2 of the included studies, with the other 3 covering the other 3 studies – hence why only 5 studies are documented as being included in the qualitative synthesis.
