# Supplementary material for: Enhanced recovery after elective caesarean: a rapid review of clinical protocols, and an umbrella review of systematic reviews
Source: PubMed Central journal article supplement (PMC5359888; doi:10.1186/s12884-017-1265-0), 2017-03-20
Supplement: 12884_2017_1265_MOESM4_ESM.pdf [file 12884_2017_1265_MOESM4_ESM.pdf]

**Additional file 4 – Table 1: Excluded studies**

| <b>Author name</b>     | <b>Reason for exclusion</b>                     |
|------------------------|-------------------------------------------------|
| Vasudevan [108]        | Not an evaluation of a relevant ERAS component. |
| Burry [109]            |                                                 |
| Chatmongkolchart [110] |                                                 |
| McDonald [111]         |                                                 |
| Soltani [112]          |                                                 |

## References

108. Vasudevan C, McGuire W. Early removal versus expectant management of central venous catheters in neonates with bloodstream infection. *Cochrane database Syst Rev.* 2011;(8):CD008436.

109. Burry L, Rose L, McCullagh IJ, Fergusson DA, Ferguson ND, Mehta S. Daily sedation interruption versus no daily sedation interruption for critically ill adult patients requiring invasive mechanical ventilation. *Cochrane database Syst Rev.* 2014;(7):CD009176.

110. Chatmongkolchart S, Prathep S. Supplemental oxygen for caesarean section during regional anaesthesia. *Cochrane database Syst Rev.* 2013;(6):CD006161.

111. McDonald S, Abbott JM, Higgins SP. Prophylactic ergometrine-oxytocin versus oxytocin for the third stage of labour. *Cochrane database Syst Rev.* 2004;(1):CD000201.

112. Soltani H, Poulouse TA, Hutchon DR. Placental cord drainage after vaginal delivery as part of the management of the third stage of labour. *Cochrane database Syst Rev.* 2011;(9):CD004665.
