# Supplementary material for: Enhanced recovery after elective caesarean: a rapid review of clinical protocols, and an umbrella review of systematic reviews
Source: PubMed Central journal article supplement (PMC5359888; doi:10.1186/s12884-017-1265-0), 2017-03-20
Supplement: 12884_2017_1265_MOESM5_ESM.pdf [file 12884_2017_1265_MOESM5_ESM.pdf]

**Additional file 5 – Table 2: Components of pathways for enhanced recovery after elective CS**

| Phase of operation | Enhanced Recovery Components                                    | Lucas [30] | Wrench [32] | Halder [31] | Damluji [33] | Abell / Long [34–36] | Frequency |
|--------------------|-----------------------------------------------------------------|------------|-------------|-------------|--------------|----------------------|-----------|
| Pre                | Patient selection                                               | -          | ✓           | -           | ✓            | -                    | 2         |
|                    | Patient advice and information                                  | ✓          | ✓           | ✓           | -            | ✓                    | 4         |
|                    | VTE risk assessment                                             | -          | -           | ✓           | -            | -                    | 1         |
|                    | Clear fluids                                                    | -          | ✓           | ✓           | -            | -                    | 2         |
|                    | Carbohydrate drink                                              | -          | ✓           | ✓           | ✓            | -                    | 3         |
|                    | Fluid balance                                                   | -          | ✓           | -           | -            | -                    | 1         |
|                    | Hemoglobin optimization                                         | ✓          | -           | ✓           | -            | -                    | 2         |
|                    | Initiate breastfeeding teaching                                 | ✓          | -           | -           | -            | -                    | 1         |
|                    | Reduced fasting times                                           | -          | -           | -           | -            | ✓                    | 1         |
| Intra              | Fluid balance                                                   | -          | ✓           | -           | -            | -                    | 1         |
|                    | Prophylactic antibiotics                                        | ✓          | -           | ✓           | -            | -                    | 2         |
|                    | Venous thromboprophylaxis                                       | ✓          | -           | ✓           | -            | -                    | 2         |
|                    | Minimally invasive surgical technique                           | -          | ✓           | ✓           | -            | -                    | 2         |
|                    | Patient warming                                                 | -          | ✓           | -           | -            | -                    | 1         |
|                    | Delayed cord clamping                                           | -          | ✓           | -           | -            | -                    | 1         |
|                    | Analgesia                                                       | ✓          | ✓           | ✓           | -            | ✓                    | 4         |
| Post               | Early oral intake                                               | ✓          | ✓           | ✓           | ✓            | ✓                    | 5         |
|                    | Early mobilization                                              | ✓          | ✓           | ✓           | ✓            | ✓                    | 5         |
|                    | Early removal of catheter                                       | ✓          | ✓           | ✓           | ✓            | ✓                    | 5         |
|                    | Regular analgesia                                               | ✓          | ✓           | ✓           | -            | -                    | 3         |
|                    | Prevention of post operative nausea and vomiting                | -          | ✓           | -           | -            | -                    | 1         |
|                    | Debriefing of patient                                           | -          | -           | ✓           | ✓            | -                    | 2         |
|                    | Early skin to skin contact (support to establish breastfeeding) | ✓          | ✓           | ✓           | -            | -                    | 3         |
|                    | Community support (midwife visits, physiotherapists etc)        | ✓          | -           | ✓           | -            | ✓                    | 3         |
|                    | Opportunity to go home on day one                               | -          | -           | -           | -            | ✓                    | 1         |
