# Supplementary material for: Enhanced recovery after elective caesarean: a rapid review of clinical protocols, and an umbrella review of systematic reviews
Source: PubMed Central journal article supplement (PMC5359888; doi:10.1186/s12884-017-1265-0), 2017-03-20
Supplement: 12884_2017_1265_MOESM6_ESM.pdf [file 12884_2017_1265_MOESM6_ESM.pdf]

**Additional file 6 – Table 3: Outcomes addressed by systematic reviews of components and pathways for ERAS**

|                                                                                     | Length of Stay | Survival | Functional outcomes | Compliance | Surgical outcomes | Anaesthetic outcomes | Post-operative complications | Post-operative pain | Process outcomes | Breastfeeding | Fetal & childhood wellbeing | Other |
|-------------------------------------------------------------------------------------|----------------|----------|---------------------|------------|-------------------|----------------------|------------------------------|---------------------|------------------|---------------|-----------------------------|-------|
| <b>Smith: Carbohydrate drink (elective surgery) [39]</b>                            | ✓              | -        | ✓                   | -          | -                 | -                    | ✓                            | -                   | -                | -             | -                           | ✓     |
| <b>Burden: Nutrition support (GI surgery) [40]</b>                                  | ✓              | ✓        | ✓                   | -          | -                 | -                    | ✓                            | -                   | ✓                | -             | -                           | -     |
| <b>Mathai: Types of surgical incisions (caesarean section) [41]</b>                 | ✓              | -        | ✓b                  | -          | ✓                 | -                    | ✓                            | ✓b                  | ✓b               | ✓             | ✓                           | ✓b    |
| <b>Alderson: Preventing hypothermia (elective surgery) [42]</b>                     | ✓              | ✓b       | ✓                   | -          | ✓                 | -                    | ✓                            | -                   | ✓                | -             | -                           | -     |
| <b>Rabe: Umbilical cord clamping (caesarean section / vaginal birth) [43] a</b>     | ✓d             | ✓b       | ✓b                  | -          | -                 | -                    | ✓b                           | -                   | ✓b               | -             | ✓                           | ✓b    |
| <b>Smaill: Antibiotic prophylaxis (caesarean section) [44]</b>                      | ✓              | -        | -                   | -          | -                 | -                    | ✓                            | -                   | -                | -             | ✓b                          | ✓b    |
| <b>Mangesi: Early oral fluids (caesarean section) [45]</b>                          | ✓              | -        | ✓                   | -          | -                 | -                    | ✓                            | ✓                   | ✓b               | ✓b            | -                           | -     |
| <b>Andersen: Early oral intake (colorectal surgery) [46]</b>                        | ✓              | ✓        | -                   | -          | -                 | -                    | ✓                            | -                   | -                | -             | -                           | -     |
| <b>Abdel-Aleem: Early catheter removal (caesarean section) [47]</b>                 | ✓              | -        | ✓                   | -          | ✓b                | -                    | ✓                            | ✓                   | ✓b               | -             | -                           | -     |
| <b>Billson: Nutrition intervention (ovarian cancer) [48]</b>                        | ✓              | ✓        | ✓                   | -          | -                 | -                    | ✓                            | -                   | ✓                | -             | -                           | -     |
| <b>Dodd: Surgical techniques (caesarean section) [49]</b>                           | ✓              | ✓        | -                   | -          | ✓                 | -                    | ✓                            | ✓                   | ✓                | ✓b            | ✓b                          | -     |
| <b>Mackeen: Surgical technique (caesarean section) [50]</b>                         | ✓              | -        | -                   | -          | ✓                 | -                    | ✓                            | ✓                   | ✓                | -             | -                           | ✓b    |
| <b>McDonald: Umbilical cord clamping (caesarean section / vaginal birth) [51] a</b> | -              | ✓b       | -                   | -          | ✓                 | -                    | ✓                            | -                   | -                | ✓             | ✓                           | ✓     |
| <b>Urrútía: Preventing hypothermia (elective surgery) [52] c</b>                    | -              | ✓b       | -                   | -          | -                 | -                    | ✓b                           | -                   | ✓b               | -             | -                           | -     |
| <b>Bamigboye: Closure vs. non closure of peritoneum (caesarean section) [53]</b>    | ✓              | ✓        | ✓                   | -          | ✓                 | -                    | ✓                            | ✓                   | ✓                | -             | -                           | ✓b    |
| <b>Afolabi: Regional vs. general anaesthesia (caesarean section) [54]</b>           | -              | ✓b       | -                   | -          | ✓                 | -                    | ✓                            | ✓                   | ✓                | -             | ✓                           | -     |

|                                                                                                                | Length of Stay | Survival | Functional outcomes | Compliance | Surgical outcomes | Anaesthetic outcomes | Post-operative complications | Post-operative pain | Process outcomes | Breastfeeding | Fetal & childhood wellbeing | Other |
|----------------------------------------------------------------------------------------------------------------|----------------|----------|---------------------|------------|-------------------|----------------------|------------------------------|---------------------|------------------|---------------|-----------------------------|-------|
| Charoenkwan: Early oral intake (gynaecologic surgery) [55]                                                     | ✓              | -        | ✓                   | -          | -                 | -                    | ✓                            | -                   | ✓                | -             | -                           | -     |
| Munday: Warming interventions (caesarean section) [37, 38]                                                     | ✓              | -        | ✓                   | -          | -                 | -                    | -                            | -                   | -                | -             | ✓                           | -     |
| Ho: Sham feeding (colorectal surgery) [56]                                                                     | ✓              | -        | ✓                   | -          | -                 | -                    | ✓                            | -                   | ✓                | -             | -                           | -     |
| Palethorpe: Alternative positions before umbilical cord clamping (caesarean section / vaginal birth) [81] a, c | -              | -        | ✓b                  | -          | ✓b                | -                    | ✓b                           | -                   | ✓b               | ✓b            | ✓b                          | ✓b    |
| Sia: Spinal anaesthesia (caesarean section) [78]                                                               | -              | -        | -                   | -          | -                 | ✓                    | -                            | -                   | -                | -             | -                           | -     |
| Jacobs-Jokhan: Repair of uterine incision (caesarean section) [79]                                             | ✓              | -        | ✓b                  | -          | ✓                 | ✓                    | ✓                            | ✓b                  | ✓                | ✓b            | -                           | ✓b    |
| Becker: Early additional food and fluids (full-term infants) [80]                                              | ✓b             | -        | -                   | -          | -                 | -                    | -                            | -                   | -                | ✓             | ✓                           | -     |
| Nicholson (Elective surgery - pathway) [57]                                                                    | ✓              | ✓        | -                   | -          | -                 | -                    | ✓                            | -                   | ✓                | -             | -                           | -     |
| Kagedan (Pancreatic surgery - pathway) [58]                                                                    | ✓              | ✓        | -                   | -          | -                 | -                    | ✓                            | -                   | ✓                | -             | -                           | ✓     |
| Markar (esophagectomy - pathway) [59]                                                                          | ✓              | ✓        | -                   | -          | -                 | -                    | ✓                            | -                   | ✓                | -             | -                           | -     |
| Hughes (liver surgery - pathway) [60]                                                                          | ✓              | -        | ✓                   | ✓          | -                 | -                    | ✓                            | -                   | -                | -             | -                           | -     |
| Coolsen (pancreatic surgery - pathway) [61]                                                                    | ✓              | ✓        | ✓                   | ✓          | -                 | -                    | ✓                            | -                   | ✓                | -             | -                           | ✓     |
| Zhuang (colorectal surgery - pathway) [62]                                                                     | ✓              | ✓        | ✓                   | -          | -                 | -                    | ✓                            | -                   | ✓                | -             | -                           | ✓     |
| Spanjersberg (colorectal surgery - pathway) [63]                                                               | ✓              | ✓        | ✓                   | ✓b         | ✓                 | -                    | ✓                            | ✓                   | ✓                | -             | -                           | ✓b    |
| Eskicioglu (colorectal surgery – pathway) [64]                                                                 | ✓              | ✓        | -                   | -          | -                 | -                    | ✓                            | -                   | ✓                | -             | -                           | -     |
| Wind (colonic surgery – pathway) [65]                                                                          | ✓              | ✓        | ✓                   | -          | -                 | -                    | ✓                            | ✓                   | ✓                | -             | -                           | -     |
| Adamina (colorectal surgery – pathway) [66]                                                                    | ✓              | -        | -                   | -          | -                 | -                    | ✓                            | -                   | ✓                | -             | -                           | -     |
| Ahmed (colorectal surgery – pathway) [67]                                                                      | ✓              | -        | -                   | ✓          | -                 | -                    | -                            | -                   | ✓                | -             | -                           | -     |
| Coolsen (liver surgery – pathway) [68]                                                                         | ✓              | ✓        | ✓                   | ✓          | -                 | -                    | ✓                            | -                   | ✓                | -             | -                           | -     |

|                                                              | Length of Stay | Survival | Functional outcomes | Compliance | Surgical outcomes | Anaesthetic outcomes | Post-operative complications | Post-operative pain | Process outcomes | Breastfeeding | Fetal & childhood wellbeing | Other |
|--------------------------------------------------------------|----------------|----------|---------------------|------------|-------------------|----------------------|------------------------------|---------------------|------------------|---------------|-----------------------------|-------|
| Hall (hepatobiliary & pancreatic surgery – pathway) [69]     | ✓              | ✓        | ✓                   | -          | ✓                 | -                    | ✓                            | -                   | ✓                | -             | -                           | -     |
| Lemmens (digestive surgery – pathway) [70]                   | ✓              | ✓        | -                   | -          | -                 | -                    | ✓                            | -                   | ✓                | -             | -                           | -     |
| Rawlinson (colorectal surgery – pathway) [71]                | ✓              | ✓        | -                   | -          | -                 | -                    | ✓                            | -                   | ✓                | -             | -                           | -     |
| Varadhan (colorectal surgery – pathway) [12]                 | ✓              | ✓        | -                   | -          | -                 | -                    | ✓                            | -                   | ✓                | -             | -                           | -     |
| Walter (colorectal resections – pathway) [72]                | ✓              | ✓        | -                   | -          | -                 | -                    | ✓                            | -                   | ✓                | -             | -                           | -     |
| Lv (colorectal surgery – pathway) [73]                       | ✓              | ✓        | -                   | -          | -                 | -                    | ✓                            | -                   | ✓                | -             | -                           | -     |
| Gouvas (colorectal surgery – pathway) [74]                   | ✓              | ✓        | ✓                   | -          | -                 | -                    | ✓                            | ✓                   | ✓                | -             | -                           | -     |
| Lv (gynaecological cancer – pathway) [75] c                  | ✓b             | ✓b       | ✓b                  | -          | -                 | -                    | ✓b                           | -                   | ✓b               | -             | -                           | -     |
| Sturm (fast-track surgery – pathway) [76]                    | ✓              | ✓        | ✓                   | -          | -                 | -                    | ✓                            | ✓                   | ✓                | -             | -                           | -     |
| Khan (colorectal surgery & enhanced recovery – pathway) [77] | -              | -        | -                   | -          | -                 | -                    | -                            | -                   | ✓                | -             | -                           | -     |
| Frequency                                                    | 39             | 28       | 24                  | 5          | 12                | 2                    | 40                           | 12                  | 37               | 7             | 9                           | 13    |

**a** – Included additional outcomes that were not relevant to this review and were therefore excluded from the above table. **b** – Outcome listed in review but not reported; omission may relate to included studies not reporting on this outcome and is not necessarily a sign of poor review conduct. For outcome categories (e.g. “Post-operative complications”) which cover a number of discrete outcomes, we have not flagged studies in this way if they have reported at least one such outcome, regardless that others may be omitted. **c** – No studies were included in the review / review was only at protocol stage. **d** – Length of stay provided for infant only (assumed to be relevant to mother).

## **Breakdown of Categories**

**Survival** includes overall survival; mortality (b [42, 43, 51, 52, 54, 75]).

**Functional outcomes** include functional measures (b [48]); time to normal function; time to functional recovery; feeding; general well-being; fatigue (b [45]); return of gastrointestinal function (b [41, 75, 79]); time of first voiding; time to start of regular diet; mobilisation (b [41, 45, 79]); time out of bed; pulmonary function; time to first food; time to first oral fluid (b [45]); time to oral intake (b [41, 79]); nutrition aspects; emotional wellbeing (b [81]); immune system function; temperature; prevention of shivering; thermal comfort; psychological wellbeing (b [43]); infant bonding (b [43]); anxieties (b [43]).

**Compliance** includes compliance (b [63]); adherence.

**Surgical outcomes** include duration of surgery (b [47]); blood loss (b [81]); abdominal drains; intra-operative pain; intra-operative bladder injury (b [47]); operative procedure on wound; operative complications (b [41]).

**Anaesthetic outcomes** include inadequate pain control requiring general / supplemental anaesthesia; requirement for and amount of ephedrine used; nausea & / or vomiting; headache within seven days from spinal anaesthesia; time to dermatomal block (thoracic T4 level); occurrence of high dermatomal sensory block (above C8 level).

**Post-operative complications** include post-operative complications (b [75]); serious infectious complication; complication rate; adverse effects (b [42, 51, 52]); re-operation rate; post-operative infection (b [41, 54, 79]); need for re-laparotomy; re-catheterisation; wound infection (b [42, 52, 54]); wound complications (b [42, 52]); endometritis (b [54]); urinary tract infection (b [54, 55]); cardiovascular complications (b [52]); pulmonary complications; febrile morbidity; post-operative pyrexia (b [41]); anastomotic leakage; temperature; intraabdominal abscess; pneumonia; post-partum haemorrhage (b [43, 81]); post-operative morbidity (b [51]); post-operative sepsis; vomiting; nausea; blood transfusion (b [52, 81]); haemoglobin level & / or haematocrit level (b [41]); haematocrit level; anaemia (b [41, 79]); wound complications; deep vein thrombosis & / or pulmonary embolism; need for iron therapy in postnatal period (b [81]); pressure ulcers (b [42, 52]); burns (b [52]); bleeding complications (b [42]); abdominal pain (b [45]); acute myocardial infarction; thrombosis; bloating (b [45]); abdominal distention; ketosis (b [45]); paralytic ileus (b [53]); postoperative ileus; hypoglycaemia (b [45]); urinary bladder distention; retention of urine; haematoma; seroma; skin separation; hypertrophic scar; thromboembolic complications (b [49, 51]); adhesion formation; pelvic pain; voiding problems (b [41, 49]); future fertility problems (b [49]); future pregnancy complications; future surgery complications (b [49]); urinary symptoms; subfertility.

**Post-operative pain** includes post-operative pain (b [41, 79]); post-operative pain relief (b [47, 49]); analgesia use (b [79]); pain scores and analgesia; pain perception; catheterisation pain / discomfort; time to analgesia; duration of analgesia (b [41]).

**Process outcomes** include readmission rates (b [75]); reclosure of skin incision; urinary catheter removed; placement of nasogastric tube; nasogastric tube removed; nasogastric tube reinsertion; women's views (b [43, 81]); patient satisfaction (b [41, 45, 47]); caregiver satisfaction (b [41, 79]); quality of life (b [63, 75]); patient reported outcomes (b [52]); unplanned high dependency or intensive care admission (b [42]); blood sugar levels (b [45]); IV fluid administration (b [45]); cosmesis; length of follow up; appearance of scar (b [41]).

**Breastfeeding** includes breastfeeding (b [49, 81]); duration; maternal self-confidence in breastfeeding (b [80]); time to initiation (b [45, 79]); unsuccessful breastfeeding (b [41, 79]; breastfeeding success (b [45]).

**Fetal & childhood wellbeing** includes mortality (b [49, 54, 80, 81]); incidence of infant morbidity; delivery time; symptoms of infection; weight; jaundice (b [80, 81]); maximum serum bilirubin levels; phototherapy (b [80]); anaemia (b [51, 81]); haemoglobin (b [81]); haematocrit; polycythaemia; temperature (b [81]); blood transfusion (b [81]); ferritin concentrations (b [81]); intraventricular haemorrhage (b [81]); cost (b [81]); adverse effects (b [44]); oral thrush (b [44]); length of stay (b [44, 49]); immune system development (b [44]); umbilical pH (b [41]); arterial or venous pH; Apgar scores (b [41]); neurodevelopmental outcome (b [43]); periventricular leukomalacia; need for resuscitation (b [43]); hypothermia (b [43]); respiratory distress; use of exogenous surfactant; oxygen dependency; chronic lung disease (b [43]); transfused for low blood pressure; inotropic support for low blood pressure; treatment for patent ductus arteriosus; treatment for hyperbilirubinaemia; blood counts (b [43]); necrotising enterocolitis; birth trauma (b [41, 49]); infant laceration (b [49]); admission to specialist unit (b [49]); readmission (b [49]); hypoxia (b [51]); time to sustained respiration (b [54]); encephalopathy (b [41]); mean regional tissue oxygenation.

**Other** includes insulin resistance or sensitivity; development of bacterial resistance (b [44]); cost (b [41, 44, 50, 51, 53, 79, 81]); effects on Rhesus-isoimmunisation (b [43]); psychological wellbeing (father) (b [43]); infant bonding (father) (b [43]); anxieties (father) (b [43]); father's views (b [43]); cost-effectiveness (b [63]); ERAS failure (b [63]); length of scar (b [50]); therapeutic uterotonic use.
