# Supplementary material for: Enhanced recovery after elective caesarean: a rapid review of clinical protocols, and an umbrella review of systematic reviews
Source: PubMed Central journal article supplement (PMC5359888; doi:10.1186/s12884-017-1265-0), 2017-03-20
Supplement: 12884_2017_1265_MOESM7_ESM.pdf [file 12884_2017_1265_MOESM7_ESM.pdf]

**Additional file 7 – Table 4: AGREE II criteria for assessing quality of studies of proposed ERAS packages in elective caesarean**

| AGREE II items                                                                                              | Lucas<br>[30] | Wrench<br>[32] | Halder<br>[31] | Abell / Long<br>[34–36] | Damluji<br>[33] |
|-------------------------------------------------------------------------------------------------------------|---------------|----------------|----------------|-------------------------|-----------------|
| <b>Domain 1. Scope and Purpose</b>                                                                          | <b>43%</b>    | <b>67%</b>     | <b>71%</b>     | <b>62%</b>              | <b>67%</b>      |
| 1. The overall objective(s) of the guideline is (are) specifically described.                               | 6             | 7              | 7              | 6                       | 6               |
| 2. The health question(s) covered by the guideline is (are) specifically described.                         | 1             | 1              | 1              | 1                       | 1               |
| 3. The population (patients, public etc) to whom the guideline is meant to apply is specifically described. | 2             | 6              | 7              | 6                       | 7               |
| <b>Domain 2. Stakeholder involvement</b>                                                                    | <b>14%</b>    | <b>100%</b>    | <b>62%</b>     | <b>24%</b>              | <b>19%</b>      |
| 4. The guideline development group includes individuals from all the relevant professional groups.          | 1             | 7              | 4              | 2                       | 1               |
| 5. The views and preferences of the target population (patients, public etc) have been sought               | 1             | 7              | 2              | 1                       | 1               |
| 6. The target users of the guideline are clearly defined.                                                   | 1             | 7              | 7              | 2                       | 2               |
| <b>Domain 3. Rigour of development</b>                                                                      | <b>14%</b>    | <b>14%</b>     | <b>23%</b>     | <b>14%</b>              | <b>14%</b>      |
| 7. Systematic methods were used to search for evidence.                                                     | 1             | 1              | 1              | 1                       | 1               |
| 8. The criteria for selecting the evidence are clearly used.                                                | 1             | 1              | 1              | 1                       | 1               |
| 9. The strengths and limitations of the body of evidence are clearly described.                             | 1             | 1              | 1              | 1                       | 1               |
| 10. The methods for formulating the recommendations are clearly described.                                  | 1             | 1              | 1              | 1                       | 1               |
| 11. The health benefits, side effects and risks have been considered in formulating the recommendations.    | 1             | 1              | 6              | 1                       | 1               |
| 12. There is an explicit link between the recommendation and the supporting evidence.                       | 1             | 1              | 1              | 1                       | 1               |
| 13. The guideline has been externally reviewed by experts prior to its publication                          | 1             | 1              | 1              | 1                       | 1               |
| 14. A procedure for updating the guideline is provided.                                                     | 1             | 1              | 1              | 1                       | 1               |
| <b>Domain 4. Clarity of presentation</b>                                                                    | <b>67%</b>    | <b>57%</b>     | <b>100%</b>    | <b>52%</b>              | <b>38%</b>      |
| 15. The recommendations are specific and unambiguous.                                                       | 6             | 4              | 7              | 6                       | 6               |
| 16. The different options for management of the condition or health issue are clearly presented.            | 1             | 1              | 7              | 1                       | 1               |
| 17. Key recommendations are easily identifiable.                                                            | 7             | 7              | 7              | 4                       | 1               |
| <b>Domain 5. Applicability</b>                                                                              | <b>39%</b>    | <b>29%</b>     | <b>57%</b>     | <b>14%</b>              | <b>14%</b>      |
| 18. The guideline provides advice and/or tools on how the recommendations can be put into practice          | 1             | 2              | 7              | 1                       | 1               |
| 19. The guideline described facilitators and barriers to its application.                                   | 7             | 3              | 1              | 1                       | 1               |
| 20. The potential resource implications of applying the recommendations have been considered.               | 2             | 2              | 1              | 1                       | 1               |

|                                                                                                  |            |             |            |            |            |
|--------------------------------------------------------------------------------------------------|------------|-------------|------------|------------|------------|
| 21. The guideline presents monitoring and/or auditing criteria.                                  | 1          | 1           | 7          | 1          | 1          |
| <b>Domain 6. Editorial Independence</b>                                                          | <b>57%</b> | <b>100%</b> | <b>57%</b> | <b>14%</b> | <b>14%</b> |
| 22. The views of the funding body have not influenced the context of the guideline.              | 7          | 7           | 7          | 1          | 1          |
| 23. Competing interests of guideline development group members have been recorded and addressed. | 1          | 7           | 1          | 1          | 1          |
| <b>TOTAL</b>                                                                                     | <b>39%</b> | <b>61%</b>  | <b>62%</b> | <b>30%</b> | <b>28%</b> |
