# Supplementary material for: Enhanced recovery after elective caesarean: a rapid review of clinical protocols, and an umbrella review of systematic reviews
Source: PubMed Central journal article supplement (PMC5359888; doi:10.1186/s12884-017-1265-0), 2017-03-20
Supplement: 12884_2017_1265_MOESM8_ESM.pdf [file 12884_2017_1265_MOESM8_ESM.pdf]

**Additional file 8 – Table 5: Aggregate Summary of Findings table**

| Author of Paper                 | Component/ Package                                               | Illustrative comparative risks (95% CI)                                            |                                                                                                       | No of Participants (studies)                                                                       | Quality of evidence (GRADE) | Comments                                                         |
|---------------------------------|------------------------------------------------------------------|------------------------------------------------------------------------------------|-------------------------------------------------------------------------------------------------------|----------------------------------------------------------------------------------------------------|-----------------------------|------------------------------------------------------------------|
|                                 |                                                                  | Assumed risk [control]                                                             | Corresponding risk [experimental]                                                                     |                                                                                                    |                             |                                                                  |
| N/A                             | <b>Patient selection</b>                                         |                                                                                    |                                                                                                       |                                                                                                    |                             | No systematic reviews identified in relation to this component.  |
| N/A                             | <b>Perioperative information</b>                                 |                                                                                    |                                                                                                       |                                                                                                    |                             | No systematic reviews identified in relation to this component.  |
| Smith [39] (elective surgery)   | <b>Preoperative drinks</b> (Carbohydrate drink)                  | Mean hospital LoS ranged across control groups from 1 to 16 days                   | Mean hospital LoS in the intervention group was 0.30 days lower (0.56 days lower to 0.04 days lower)  | n= 1351 (19 studies)<br><br>(27 studies in total but only 19 reported on LoS)                      | ⊕⊖⊖⊖<br>very low            | Substantial heterogeneity<br>Publication bias                    |
| Burden [40] (GI surgery)        | (Immune enhancing drink)                                         | Mean hospital LoS in the control groups was 15.3 days (ranged from 9.8 to 25 days) | Mean hospital LoS in the intervention groups was 0.97 days lower (1.64 days lower to 0.30 days lower) | n=549 (6 studies)<br><br>(13 studies in total but only 6 reported on LoS)                          | ⊕⊕⊕⊖<br>moderate            | Low to moderate heterogeneity<br>No blinding<br>Publication bias |
| N/A                             | <b>Preoperative fluids</b>                                       |                                                                                    |                                                                                                       |                                                                                                    |                             | No systematic reviews identified in relation to this component.  |
| N/A                             | <b>Perioperative fluid balance</b>                               |                                                                                    |                                                                                                       |                                                                                                    |                             | No systematic reviews identified in relation to this component.  |
| Mathai [41] (caesarean section) | <b>Surgical technique</b> (Joel Cohen vs. Pfannensteil incision) | Mean hospital LoS in Pfannensteil group was 5.9 days                               | Mean hospital LoS in the Joel Cohen group was 1.5 days lower (2.16 days lower to 0.84 days lower)     | n=101 (1 study)<br><br>(2 studies in total focusing on this technique, but only 1 reported on LoS) | ⊕⊖⊖⊖<br>very low            | Small sample size<br>Single study<br>No blinding                 |

|                                        |                                                                      |                                                                                  |                                                                                                                                                 |                                                                                                     |                  |                                                                                                                                                |
|----------------------------------------|----------------------------------------------------------------------|----------------------------------------------------------------------------------|-------------------------------------------------------------------------------------------------------------------------------------------------|-----------------------------------------------------------------------------------------------------|------------------|------------------------------------------------------------------------------------------------------------------------------------------------|
|                                        | (Muscle-cutting vs. Pfannensteil incision)                           | Mean hospital LoS in Pfannensteil group was 6.3 days                             | Mean hospital LoS in the muscle-cutting group was 0.4 days higher (0.34 lower to 1.14 days higher)                                              | n=97 (1 study)<br><br>(2 studies in total focusing on this technique, but only 1 reported on LoS)   | ⊕⊖⊖⊖<br>very low | Small sample size<br>Single study<br>No blinding                                                                                               |
| Dodd [49] (caesarean section)          | (Single layer uterine closure vs. double layer)                      | Mean hospital LoS in double layer group was 4.9 days                             | Mean hospital LoS in single layer group was 0.10 days lower (0.52 days lower to 0.32 days higher)                                               | n=158 (1 study)<br><br>(19 studies in total focusing on this technique, but only 1 reported on LoS) | ⊕⊖⊖⊖<br>very low | Small sample size<br>Single study<br>No blinding                                                                                               |
| Mackeen [50] (caesarean section)       | (Staples vs. subcuticular stitch)                                    | Mean hospital LoS in subcuticular group was 3.1 days                             | Mean hospital LoS in staples group was 0.10 days higher (0.01 days lower to 0.21 days higher)                                                   | n=416 (1 study)<br><br>(6 studies in total focusing on this technique, but only 1 reported on LoS)  | ⊕⊖⊖⊖<br>very low | Single study<br>Unclear blinding<br>Incomplete data                                                                                            |
| Jacobs-Jokhan [79] (caesarean section) | (Extra-abdominal vs. intra-abdominal repair of the uterine incision) | Mean postoperative LoS ranged across intra-abdominal group from 3.45 to 5.6 days | Mean postoperative LoS in the extra-abdominal group was 0.24 days higher (0.08 days higher to 0.39 days higher)                                 | n=766 (4 studies)<br><br>(6 studies in total but only 4 reported on LoS)                            | ⊕⊕⊕⊖<br>moderate | All four studies were RCTs<br>Uncertainty over allocation concealment in most studies                                                          |
| Alderson [42] (elective surgery)       | <b>Patient warming</b>                                               | Mean post anaesthesia care unit (PACU) LoS in control group was 160 minutes      | Mean hospital post anaesthesia care unit (PACU) LoS in the intervention group was 9 minutes lower (45.32 minutes lower to 27.32 minutes higher) | n=40 (1 study)<br><br>(22 studies in total but only 1 reported on LoS)                              | ⊕⊖⊖⊖<br>very low | Small sample size<br>Single study<br>No blinding<br>Wide CI with data from small number of patients in study<br>Unclear allocation concealment |
| N/A                                    | <b>Perioperative analgesia</b>                                       |                                                                                  |                                                                                                                                                 |                                                                                                     |                  | No systematic reviews identified in relation to this component.                                                                                |

|                                                  |                                             |                                                                                                                                                                                           |                                                                                                                                                                                                                                                             |                                                                                 |                  |                                                                 |
|--------------------------------------------------|---------------------------------------------|-------------------------------------------------------------------------------------------------------------------------------------------------------------------------------------------|-------------------------------------------------------------------------------------------------------------------------------------------------------------------------------------------------------------------------------------------------------------|---------------------------------------------------------------------------------|------------------|-----------------------------------------------------------------|
| Rabe [43]<br>(caesarean section / vaginal birth) | <b>Delayed umbilical cord clamping</b>      | Mean hospital LoS (infant only) in control group was 56.6 days                                                                                                                            | Mean hospital LoS (infant only) in the intervention group was 16.40 days lower (38.06 days lower to 5.26 days higher)                                                                                                                                       | n=32<br>(1 study)<br><br>(15 studies in total but only 1 reported on LoS)       | ⊕⊕⊖⊖<br>low      | Low population<br>Single study                                  |
| N/A                                              | <b>Prevention of post operative nausea</b>  |                                                                                                                                                                                           |                                                                                                                                                                                                                                                             |                                                                                 |                  | No systematic reviews identified in relation to this component. |
| Smaill [44]<br>(caesarean section)               | <b>Postoperative antibiotic prophylaxis</b> | Mean hospital LoS ranged across control group from 5.24 to 12.1 days                                                                                                                      | Mean hospital LoS in the intervention group was 0.49 days lower (0.68 days lower to 0.29 days lower)                                                                                                                                                        | n=3119<br>(17 studies)<br><br>(86 studies in total but only 17 reported on LoS) | ⊕⊕⊕⊖<br>moderate | Low to moderate heterogeneity<br>Potential for publication bias |
| Mangesi [45]<br>(caesarean section)              | <b>Early postoperative fluids/food</b>      | Mean postoperative LoS ranged across control groups from 3.1 to 3.7 days                                                                                                                  | Mean postoperative LoS in the intervention group was 0.46 days lower (1.21 days lower to 0.30 days higher)                                                                                                                                                  | n=338<br>(3 studies)<br><br>(6 studies in total but only 3 reported on LoS)     | ⊕⊕⊖⊖<br>low      | Substantial heterogeneity<br>Small number of studies            |
| Andersen [46]<br>(colorectal surgery)            |                                             | Mean hospital LoS ranged across control group from 6.8 to 16 days                                                                                                                         | Mean hospital LoS in the intervention group was 0.89 days lower (1.58 days lower to 0.20 days lower)                                                                                                                                                        | n=1132<br>(14 studies)                                                          | ⊕⊕⊕⊖<br>moderate | Evidence of heterogeneity                                       |
| Charoenkwan [55]<br>(gynecologic surgery)        |                                             | Mean hospital LoS ranged across control group from 3.64 to 5.8 days (fixed effect model)<br><br>Mean hospital LoS ranged across control group from 3.64 to 5.8 days (random effect model) | Mean hospital LoS in the intervention group was 0.50 days lower (0.75 days lower to 0.24 days lower) (fixed effect model)<br><br>Mean hospital LoS in the intervention group was 0.74 days lower (1.52 days lower to 0.07 days lower) (random effect model) | n=301<br>(2 studies)<br><br>(3 studies in total but only 2 reported on LoS)     | ⊕⊕⊕⊖<br>moderate | Small sample size                                               |

|                                           |                                                                           |                                                                                                                                           |                                                                                                                                                                               |                                                                                                  |                  |                                                                                                                              |
|-------------------------------------------|---------------------------------------------------------------------------|-------------------------------------------------------------------------------------------------------------------------------------------|-------------------------------------------------------------------------------------------------------------------------------------------------------------------------------|--------------------------------------------------------------------------------------------------|------------------|------------------------------------------------------------------------------------------------------------------------------|
| Ho [56]<br>(colorectal surgery)           | <b>Sham feeding</b>                                                       | Unknown                                                                                                                                   | Mean hospital LoS in the intervention group was 0.5 days lower (0.86 days lower to 0.14 days lower)                                                                           | n=535<br>(8 studies)<br><br>(10 studies in total but only 8 reported on LoS)                     | ⊕⊕⊖⊖<br>low      | Substantial heterogeneity<br>Some small sample sizes<br>All eight studies were RCTs                                          |
| Abdel-Aleem [47]<br>(caesarean section)   | <b>Early removal of catheter</b><br>(Indwelling catheter vs. no catheter) | Mean hospital LoS ranged across control group from 1.88 to 3.06 days                                                                      | Mean hospital LoS in the intervention group was 0.62 days higher (0.15 days higher to 1.10 days higher)                                                                       | n=840<br>(3 studies)<br><br>(5 studies in total but only 3 reported on LoS)                      | ⊕⊕⊖⊖<br>low      | Substantial heterogeneity<br>Small number of studies                                                                         |
| N/A                                       | <b>Postoperative mobilization</b>                                         |                                                                                                                                           |                                                                                                                                                                               |                                                                                                  |                  | No systematic reviews identified in relation to this component.                                                              |
| Nicholson [57]<br>(elective surgery)      | <b>Enhanced recovery after surgery (ERAS) package</b>                     | Median LoS ranged across control groups from 3 to 11 days                                                                                 | Mean hospital LoS in the intervention groups was 1.14 days lower (1.45 days lower to 0.85 days lower)                                                                         | n=2995<br>(23 studies)<br><br>(38 studies in total but only 23 reported on LoS)                  | ⊕⊕⊖⊖<br>low      | Substantial heterogeneity<br>No blinding                                                                                     |
| Spanjersberg [63]<br>(colorectal surgery) |                                                                           | Mean hospital LoS ranged across control groups from 7 to 10.4 days                                                                        | Mean hospital LoS in the intervention groups was 2.94 days lower (3.69 days lower to 2.19 days lower)                                                                         | n=237<br>(4 studies)<br><br>(6 studies in total but only 4 reported on LoS)                      | ⊕⊖⊖⊖<br>very low | Substantial heterogeneity<br>Low sample size<br>No blinding<br>Lack of clarity between research question and primary outcome |
| Markar [59]<br>(esophagectomy)            |                                                                           | Unknown                                                                                                                                   | Mean hospital LoS in the intervention groups was 2.28 days lower (3.12 days lower to 1.43 days lower)                                                                         | n=1240<br>(9 studies)                                                                            | ⊕⊕⊕⊖<br>moderate | Substantial heterogeneity<br>High risk of bias                                                                               |
| Zhuang [62]<br>(colorectal surgery)       |                                                                           | Mean primary hospital LoS ranged across control groups from 4 to 7.4 days<br><br>(Total hospital LoS also reported but not included here) | Mean primary hospital LoS in the intervention groups was 2.44 days lower (3.06 days lower to 1.83 days lower)<br><br>(Total hospital LoS also reported but not included here) | n=1740<br>(11 studies)<br><br>(13 studies in total but only 11 reported on primary hospital LoS) | ⊕⊕⊖⊖<br>low      | Some heterogeneity<br>High risk of bias<br>No blinding<br>Publication bias                                                   |

|                                        |                                                                                           |                                                                                                               |                                                                              |                  |                                                                                                                 |  |
|----------------------------------------|-------------------------------------------------------------------------------------------|---------------------------------------------------------------------------------------------------------------|------------------------------------------------------------------------------|------------------|-----------------------------------------------------------------------------------------------------------------|--|
|                                        |                                                                                           |                                                                                                               |                                                                              |                  |                                                                                                                 |  |
| Varadhan [12]<br>(colorectal surgery)  | Mean hospital LoS ranged across control groups from 5.8 to 10.4 days                      | Mean hospital LoS in the intervention groups was 2.51 days lower (3.54 days lower to 1.47 days lower)         | n=452<br>(6 studies)                                                         | ⊕⊕⊖⊖<br>low      | Substantial heterogeneity<br>Lack of study data<br>Significant risk of bias<br>All six studies were RCTs        |  |
| Walter [72]<br>(colorectal resections) | Mean total hospital LoS ranged across control groups from 8 to 21 days                    | Mean total hospital LoS in the intervention groups was 3.75 days lower (5.11 days lower to 2.40 days lower)   | n=376<br>(4 studies)                                                         | ⊕⊕⊕⊖<br>moderate | Low to moderate heterogeneity<br>Two studies were RCTs                                                          |  |
| Lv [73]<br>(colorectal surgery)        | Mean total hospital LoS ranged across control groups from 6 to 10.4 days                  | Mean total hospital LoS in the intervention groups was 1.88 days lower (2.91 days lower to 0.86 days lower)   | n=852<br>(7 studies)                                                         | ⊕⊕⊖⊖<br>low      | Moderate risk of bias<br>No blinding<br>All seven studies were RCTs<br>Substantial heterogeneity                |  |
| Adamina [66]<br>(colorectal surgery)   | Median hospital LoS ranged across control groups (where reported) from 7 to 9 days        | Median hospital LoS in the intervention groups was 2.5 days lower (3.92 days lower to 1.11 days lower)        | n=452<br>(6 studies)                                                         | ⊕⊕⊕⊖<br>moderate | All studies were RCTs<br>Wide CI with mainly small sample sizes                                                 |  |
| Wind [65]<br>(colonic surgery)         | Mean primary hospital LoS ranged across control groups from 5.8 to 10 days                | Mean primary hospital LoS in the intervention groups was 1.56 days lower (2.61 days lower to 0.50 days lower) | n=460<br>(5 studies)<br><br>(6 studies in total but only 5 reported on LoS)  | ⊕⊕⊖⊖<br>low      | Several sources of bias, potential for publication bias<br>Substantial heterogeneity<br>Three studies were RCTs |  |
| Gouvas [74]<br>(colorectal surgery)    | Mean total hospital LoS ranged across control groups (where reported) from 6.5 to 13 days | Mean total hospital LoS in the intervention groups was 2.46 days lower (3.43 days lower to 1.48 days lower)   | n=639<br>(5 studies)<br><br>(11 studies in total but only 5 reported on LoS) | ⊕⊕⊖⊖<br>low      | Two studies were RCTs<br>Some small sample sizes<br>No blinding                                                 |  |

**Please note that 15 studies were not presented in the above table as they did not report sufficiently, on length of stay. These were: Hughes [60], Kagedan [58], Bamigboye [53], Munday [37, 38], Hall [69], Lemmens [70], Eskicioglu [64], Ahmed [67], Coolsen [61], Lv [75], Sturm [76], Coolsen [68], Rawlinson [71], Billson [48] and Becker [80]. A further 6 studies were not presented as they did not report on length of stay: McDonald [51], Urrútia [52], Afolabi [54], Khan [77], Palethorpe [81], and Sia [78].**
