# Supplementary material for: Enhanced recovery after elective caesarean: a rapid review of clinical protocols, and an umbrella review of systematic reviews
Source: PubMed Central journal article supplement (PMC5359888; doi:10.1186/s12884-017-1265-0), 2017-03-20
Supplement: 12884_2017_1265_MOESM9_ESM.pdf [file 12884_2017_1265_MOESM9_ESM.pdf]

**Additional file 9 – Table 6: AMSTAR Assessment**

| <b>AMSTAR Items</b>                                                                                  | <b>Smith [39]</b><br><i>(elective surgery)</i> | <b>Burden [40]</b><br><i>(GI surgery)</i> | <b>Mathai [41]</b><br><i>(caesarean section)</i> | <b>Alderson [42]</b><br><i>(elective surgery)</i> | <b>Rabe [43]</b><br><i>(caesarean section / vaginal birth)</i> | <b>Smaill [44]</b><br><i>(caesarean section)</i> | <b>Mangesi [45]</b><br><i>(caesarean section)</i> | <b>Andersen [46]</b><br><i>(colorectal surgery)</i> | <b>Abdel-Aleem [47]</b><br><i>(caesarean section)</i> | <b>Billson [48]</b><br><i>(ovarian cancer)</i> |
|------------------------------------------------------------------------------------------------------|------------------------------------------------|-------------------------------------------|--------------------------------------------------|---------------------------------------------------|----------------------------------------------------------------|--------------------------------------------------|---------------------------------------------------|-----------------------------------------------------|-------------------------------------------------------|------------------------------------------------|
| 1. Was an 'a priori' design provided?                                                                | Yes                                            | Yes                                       | Yes                                              | Yes                                               | Yes                                                            | Yes                                              | Yes                                               | Yes                                                 | Yes                                                   | Yes                                            |
| 2. Was there duplicate study selection and data extraction?                                          | Yes                                            | Yes                                       | Yes                                              | Yes                                               | Yes                                                            | Yes                                              | Can't answer                                      | Yes                                                 | Yes                                                   | Yes                                            |
| 3. Was a comprehensive literature search performed?                                                  | Yes                                            | Yes                                       | Yes                                              | Yes                                               | Yes                                                            | Yes                                              | Yes                                               | Yes                                                 | Yes                                                   | Yes                                            |
| 4. Was the status of publication (i.e. grey literature) used as an inclusion criterion?              | Yes                                            | Can't answer                              | Yes                                              | Yes                                               | Yes                                                            | Yes                                              | Yes                                               | Yes                                                 | Yes                                                   | Yes                                            |
| 5. Was a list of studies (included and excluded) provided?                                           | Yes                                            | Yes                                       | Yes                                              | Yes                                               | Yes                                                            | Yes                                              | Yes                                               | Yes                                                 | Yes                                                   | Yes                                            |
| 6. Were the characteristics of the included studies provided?                                        | Yes                                            | Yes                                       | Yes                                              | Yes                                               | Yes                                                            | Yes                                              | Yes                                               | Yes                                                 | Yes                                                   | Yes                                            |
| 7. Was the scientific quality of the included studies assessed and documented?                       | Yes                                            | Yes                                       | Yes                                              | Yes                                               | Yes                                                            | Yes                                              | Can't answer                                      | Yes                                                 | Yes                                                   | Yes                                            |
| 8. Was the scientific quality of the included studies used appropriately in formulating conclusions? | Yes                                            | Yes                                       | Can't answer                                     | Yes                                               | Yes                                                            | Yes                                              | Yes                                               | Yes                                                 | Yes                                                   | Yes                                            |
| 9. Were the methods used to combine the findings of studies appropriate?                             | Yes                                            | Yes                                       | N/A                                              | N/A                                               | N/A                                                            | Yes                                              | Yes                                               | Yes                                                 | N/A                                                   | N/A                                            |
| 10. Was the likelihood of publication bias assessed?                                                 | Yes                                            | No                                        | No                                               | No                                                | Yes                                                            | Yes                                              | No                                                | Yes                                                 | No                                                    | No                                             |
| 11. Was the conflict of interest included?                                                           | Yes                                            | Yes                                       | Yes                                              | Yes                                               | Yes                                                            | No                                               | No                                                | No                                                  | No                                                    | Yes                                            |

| <b>AMSTAR Items</b>                                                                                  | <b>Dodd [49]</b><br><i>(caesarean section)</i> | <b>Mackeen [50]</b><br><i>(caesarean section)</i> | <b>McDonald [51]</b><br><i>(caesarean section / vaginal birth)</i> | <b>Urrútia [52]</b><br><i>(elective surgery)</i> | <b>Bamigboye [53]</b><br><i>(caesarean section)</i> | <b>Afolabi [54]</b><br><i>(caesarean section)</i> | <b>Charoenkwan [55]</b><br><i>(gynaecologic surgery)</i> | <b>Munday [37, 38]</b><br><i>(caesarean section)</i> | <b>Ho [56]</b><br><i>(colorectal surgery)</i> | <b>Nicholson [57]</b><br><i>(elective surgery)</i> |
|------------------------------------------------------------------------------------------------------|------------------------------------------------|---------------------------------------------------|--------------------------------------------------------------------|--------------------------------------------------|-----------------------------------------------------|---------------------------------------------------|----------------------------------------------------------|------------------------------------------------------|-----------------------------------------------|----------------------------------------------------|
| 1. Was an 'a priori' design provided?                                                                | Yes                                            | Yes                                               | Yes                                                                | Yes                                              | Yes                                                 | Yes                                               | Yes                                                      | Yes                                                  | Yes                                           | Yes                                                |
| 2. Was there duplicate study selection and data extraction?                                          | Yes                                            | Yes                                               | Yes                                                                | Yes                                              | Yes                                                 | Yes                                               | Yes                                                      | Can't answer                                         | Can't answer                                  | Yes                                                |
| 3. Was a comprehensive literature search performed?                                                  | Yes                                            | Yes                                               | Yes                                                                | Yes                                              | Yes                                                 | Yes                                               | Yes                                                      | Yes                                                  | No                                            | Yes                                                |
| 4. Was the status of publication (i.e. grey literature) used as an inclusion criterion?              | Yes                                            | Yes                                               | Yes                                                                | Yes                                              | Yes                                                 | Yes                                               | Can't answer                                             | Yes                                                  | No                                            | Can't answer                                       |
| 5. Was a list of studies (included and excluded) provided?                                           | Yes                                            | Yes                                               | Yes                                                                | Yes                                              | Yes                                                 | Yes                                               | Yes                                                      | Yes                                                  | No (only included studies)                    | Can't answer                                       |
| 6. Were the characteristics of the included studies provided?                                        | Yes                                            | Yes                                               | Yes                                                                | Yes                                              | Yes                                                 | Yes                                               | Yes                                                      | Yes                                                  | Yes                                           | No                                                 |
| 7. Was the scientific quality of the included studies assessed and documented?                       | Yes                                            | Yes                                               | Yes                                                                | Yes                                              | Yes                                                 | Yes                                               | Yes                                                      | Yes                                                  | Yes                                           | No                                                 |
| 8. Was the scientific quality of the included studies used appropriately in formulating conclusions? | Yes                                            | Yes                                               | Yes                                                                | Yes                                              | Yes                                                 | Yes                                               | Yes                                                      | Yes                                                  | Yes                                           | No                                                 |
| 9. Were the methods used to combine the findings of studies appropriate?                             | N/A                                            | N/A                                               | N/A                                                                | N/A                                              | N/A                                                 | N/A                                               | Yes                                                      | Yes                                                  | No                                            | Yes                                                |
| 10. Was the likelihood of publication bias assessed?                                                 | Yes                                            | Yes                                               | Yes                                                                | Yes                                              | Yes                                                 | No                                                | Yes                                                      | No                                                   | Yes                                           | Yes                                                |
| 11. Was the conflict of interest included?                                                           | Yes                                            | Yes                                               | Yes                                                                | Yes                                              | Yes                                                 | Yes                                               | Yes                                                      | No                                                   | No                                            | Yes                                                |

| <b>AMSTAR Items</b>                                                                                  | <b>Kadegan [58]</b><br><i>(pancreatic surgery)</i> | <b>Markar [59]</b><br><i>(esophagectomy)</i> | <b>Hughes [60]</b><br><i>(liver surgery)</i> | <b>Coolsen [61]</b><br><i>(pancreatic surgery)</i> | <b>Zhuang [62]</b><br><i>(colorectal surgery)</i> | <b>Spanjersberg [63]</b><br><i>(colorectal surgery)</i> | <b>Eskicioglu [64]</b><br><i>(colorectal surgery)</i> | <b>Wind [65]</b><br><i>(colonic surgery)</i> | <b>Adamina [66]</b><br><i>(colorectal surgery)</i> | <b>Ahmed [67]</b><br><i>(colorectal surgery)</i> |
|------------------------------------------------------------------------------------------------------|----------------------------------------------------|----------------------------------------------|----------------------------------------------|----------------------------------------------------|---------------------------------------------------|---------------------------------------------------------|-------------------------------------------------------|----------------------------------------------|----------------------------------------------------|--------------------------------------------------|
| 1. Was an 'a priori' design provided?                                                                | Can't answer                                       | Can't answer                                 | Can't answer                                 | Can't answer                                       | Can't answer                                      | Yes                                                     | Can't answer                                          | Can't answer                                 | Can't answer                                       | Can't answer                                     |
| 2. Was there duplicate study selection and data extraction?                                          | Can't answer                                       | Yes                                          | Yes                                          | Yes                                                | Can't answer                                      | Can't answer                                            | Yes                                                   | Can't answer                                 | Yes                                                | Can't answer                                     |
| 3. Was a comprehensive literature search performed?                                                  | Yes                                                | Yes                                          | Yes                                          | Yes                                                | Yes                                               | Yes                                                     | Yes                                                   | Yes                                          | Yes                                                | Yes                                              |
| 4. Was the status of publication (i.e. grey literature) used as an inclusion criterion?              | Can't answer                                       | Yes                                          | Can't answer                                 | Can't answer                                       | Can't answer                                      | Yes                                                     | Yes                                                   | No                                           | No                                                 | No                                               |
| 5. Was a list of studies (included and excluded) provided?                                           | No (only included studies)                         | No                                           | No (only included studies)                   | No                                                 | No                                                | Yes                                                     | Yes                                                   | Yes                                          | Yes                                                | Yes                                              |
| 6. Were the characteristics of the included studies provided?                                        | Yes                                                | No                                           | Yes                                          | Yes                                                | Yes                                               | Yes                                                     | Yes (participant numbers unclear)                     | Yes                                          | No                                                 | Yes                                              |
| 7. Was the scientific quality of the included studies assessed and documented?                       | Yes                                                | Yes                                          | No                                           | Yes                                                | Yes                                               | Yes                                                     | No (assessed but not documented)                      | No (assessed but not documented)             | No (assessed but not documented)                   | No                                               |
| 8. Was the scientific quality of the included studies used appropriately in formulating conclusions? | Yes                                                | Yes                                          | No                                           | Yes                                                | Yes                                               | Yes                                                     | No                                                    | No                                           | No                                                 | No                                               |
| 9. Were the methods used to combine the findings of studies appropriate?                             | Yes                                                | Yes                                          | N/A                                          | Can't answer                                       | Can't answer                                      | Yes                                                     | Yes                                                   | Yes                                          | Yes                                                | Can't answer                                     |
| 10. Was the likelihood of publication bias assessed?                                                 | No                                                 | Yes                                          | No                                           | Yes                                                | Yes                                               | Yes                                                     | No (funnel plots mentioned but not documented)        | No                                           | No                                                 | No                                               |
| 11. Was the conflict of interest included?                                                           | Yes                                                | Yes                                          | Yes                                          | Yes                                                | Yes                                               | Yes                                                     | No                                                    | No                                           | No                                                 | No                                               |

| <b>AMSTAR Items</b>                                                                                  | <b>Coolsen [68]</b><br><i>(liver surgery)</i> | <b>Hall [69]</b><br><i>(hepatobiliary &amp; pancreatic surgery)</i> | <b>Lemmens [70]</b><br><i>(digestive surgery)</i> | <b>Rawlinson [71]</b><br><i>(colorectal surgery)</i> | <b>Varadhan [12]</b><br><i>(colorectal surgery)</i> | <b>Walter [72]</b><br><i>(colorectal resections)</i> | <b>Lv [73]</b><br><i>(colorectal surgery)</i> | <b>Gouvas [74]</b><br><i>(colorectal surgery)</i> | <b>Lv [75]</b><br><i>(gynaecological cancer)</i> | <b>Sturm [76]</b><br><i>(fast-track surgery)</i> |
|------------------------------------------------------------------------------------------------------|-----------------------------------------------|---------------------------------------------------------------------|---------------------------------------------------|------------------------------------------------------|-----------------------------------------------------|------------------------------------------------------|-----------------------------------------------|---------------------------------------------------|--------------------------------------------------|--------------------------------------------------|
| 1. Was an 'a priori' design provided?                                                                | Can't answer                                  | Can't answer                                                        | Can't answer                                      | Can't answer                                         | Can't answer                                        | Can't answer                                         | Can't answer                                  | Can't answer                                      | Can't answer                                     | Can't answer                                     |
| 2. Was there duplicate study selection and data extraction?                                          | Can't answer                                  | Can't answer                                                        | Yes                                               | Can't answer                                         | Yes                                                 | Can't answer                                         | Yes                                           | Can't answer                                      | Yes                                              | No                                               |
| 3. Was a comprehensive literature search performed?                                                  | Yes                                           | No                                                                  | No                                                | No                                                   | Yes                                                 | Yes                                                  | Yes                                           | Yes                                               | Yes                                              | Yes                                              |
| 4. Was the status of publication (i.e. grey literature) used as an inclusion criterion?              | No                                            | No                                                                  | No                                                | No                                                   | Yes                                                 | No                                                   | No                                            | No                                                | Yes                                              | Yes                                              |
| 5. Was a list of studies (included and excluded) provided?                                           | Yes                                           | Yes                                                                 | No                                                | Yes                                                  | No                                                  | No                                                   | No                                            | Yes                                               | N/A                                              | No                                               |
| 6. Were the characteristics of the included studies provided?                                        | Yes                                           | Yes                                                                 | Yes                                               | Yes                                                  | Yes                                                 | Yes                                                  | Yes                                           | Yes                                               | N/A                                              | Yes                                              |
| 7. Was the scientific quality of the included studies assessed and documented?                       | No (assessed but not documented)              | No                                                                  | No                                                | No                                                   | Yes                                                 | Yes                                                  | Yes                                           | Yes                                               | Yes                                              | Yes                                              |
| 8. Was the scientific quality of the included studies used appropriately in formulating conclusions? | No                                            | No                                                                  | No                                                | No                                                   | Yes                                                 | Yes                                                  | No                                            | No                                                | N/A                                              | Yes                                              |
| 9. Were the methods used to combine the findings of studies appropriate?                             | Can't answer                                  | Can't answer                                                        | Can't answer                                      | Can't answer                                         | Yes                                                 | Yes                                                  | Yes                                           | Yes                                               | N/A                                              | Can't answer                                     |
| 10. Was the likelihood of publication bias assessed?                                                 | No                                            | No                                                                  | No                                                | No                                                   | No                                                  | Yes                                                  | Yes                                           | No (funnel plots mentioned but not documented)    | Yes                                              | No                                               |
| 11. Was the conflict of interest included?                                                           | No                                            | No                                                                  | No                                                | No                                                   | No                                                  | No                                                   | No                                            | No                                                | Yes                                              | No                                               |

| <b>AMSTAR Items</b>                                                                                  | <b>Khan [77]</b><br><i>(colorectal surgery &amp; enhanced recovery)</i> | <b>Palethorpe [81]</b><br><i>(caesarean section / vaginal birth)</i> | <b>Sia [78]</b><br><i>(caesarean section)</i> | <b>Jacobs-Jokhan [79]</b><br><i>(caesarean section)</i> | <b>Becker [80]</b><br><i>(caesarean section)</i> |
|------------------------------------------------------------------------------------------------------|-------------------------------------------------------------------------|----------------------------------------------------------------------|-----------------------------------------------|---------------------------------------------------------|--------------------------------------------------|
| 1. Was an 'a priori' design provided?                                                                | Can't answer                                                            | Yes                                                                  | Yes                                           | Yes                                                     | Yes                                              |
| 2. Was there duplicate study selection and data extraction?                                          | Can't answer                                                            | Can't answer                                                         | Yes                                           | Can't answer                                            | Yes                                              |
| 3. Was a comprehensive literature search performed?                                                  | Yes                                                                     | No                                                                   | Yes                                           | Yes                                                     | Yes                                              |
| 4. Was the status of publication (i.e. grey literature) used as an inclusion criterion?              | No                                                                      | Yes                                                                  | Yes                                           | Yes                                                     | Yes                                              |
| 5. Was a list of studies (included and excluded) provided?                                           | No                                                                      | Yes                                                                  | Yes                                           | Yes                                                     | Yes                                              |
| 6. Were the characteristics of the included studies provided?                                        | Yes                                                                     | N/A                                                                  | Yes                                           | Yes                                                     | Yes                                              |
| 7. Was the scientific quality of the included studies assessed and documented?                       | Yes                                                                     | N/A                                                                  | Yes                                           | Yes                                                     | Yes                                              |
| 8. Was the scientific quality of the included studies used appropriately in formulating conclusions? | Yes                                                                     | N/A                                                                  | Yes                                           | Yes                                                     | Yes                                              |
| 9. Were the methods used to combine the findings of studies appropriate?                             | Yes                                                                     | N/A                                                                  | Yes                                           | Yes                                                     | Yes                                              |
| 10. Was the likelihood of publication bias assessed?                                                 | No                                                                      | N/A                                                                  | No                                            | No                                                      | Yes                                              |
| 11. Was the conflict of interest included?                                                           | No                                                                      | Yes                                                                  | No                                            | No                                                      | No                                               |
