# Supplementary material for: Enhanced recovery after elective caesarean: a rapid review of clinical protocols, and an umbrella review of systematic reviews
Source: PubMed Central journal article supplement (PMC5359888; doi:10.1186/s12884-017-1265-0), 2017-03-20
Supplement: 12884_2017_1265_MOESM11_ESM.pdf [file 12884_2017_1265_MOESM11_ESM.pdf]

**Additional file 11 – Table 7: Interventions, mechanisms and actions**

| Phase of Operation | Intervention                                                                                               | Mechanism of action                                                                    | Intermediate actions                                                                                                                                                         |
|--------------------|------------------------------------------------------------------------------------------------------------|----------------------------------------------------------------------------------------|------------------------------------------------------------------------------------------------------------------------------------------------------------------------------|
| Preoperative       | Patient education                                                                                          | Increases patient knowledge about procedure and what to expect                         | Reduced anxiety, improved pain control, aware of milestones to discharge → <b>Reduced LoS</b>                                                                                |
|                    | Hydration (clear oral fluids up to two hours preoperatively)                                               | Reduces the chances of postoperative dehydration.                                      | Less need for postoperative intravenous fluids with earlier discontinuation of them → <b>Reduced LoS</b>                                                                     |
|                    | Nutrition and carbohydrate drinks                                                                          | Reduces the insulin resistance associated with surgery.                                | Fewer postoperative infections and less breakdown of muscle protein. There are also reduced feelings of hunger and thirst and patients are less anxious → <b>Reduced LoS</b> |
|                    | Avoidance of premedication                                                                                 | Avoids long acting sedatives such as diazepam                                          | Reduces psychomotor impairment during the postoperative period. Early mobilization → <b>Reduced LoS</b>                                                                      |
|                    | Prophylactic antibiotics                                                                                   | Prevents infection at site of surgical incision                                        | Reduces postoperative complications → <b>Reduced LoS</b>                                                                                                                     |
| Intra operative    | Spinal (regional) anaesthesia                                                                              | Reduces the body's stress response compared to general anaesthetic                     | Patient experiences less stress and so recovers more quickly                                                                                                                 |
|                    | Long acting regional opioids (opioids added to local anaesthetic for spinal anaesthesia)                   | Reduces postoperative pain and consequently reduces the demand for morphine injections | Fewer side effects from strong morphine like pain killers (sleepiness, nausea etc) enabling earlier mobilization → <b>Reduced LoS</b>                                        |
|                    | Anti-sickness drugs                                                                                        | Reduces postoperative nausea and vomiting                                              | Reduced nausea, increased mobilization → <b>Reduced LoS</b>                                                                                                                  |
|                    | Patient warming                                                                                            | Prevents postoperative hypothermia                                                     | Reduced stress response and fewer wound infections, bleeding and heart problems → <b>Reduced LoS</b>                                                                         |
|                    | Minimally invasive surgical technique: Horizontal lower abdominal incision for surgery (national standard) | Reduces postoperative pain thus reduces the need for morphine injections to control it | There is less need for strong pain killers that would have side effects, keeping patients in bed for longer. Early mobilization → <b>Reduced LoS</b>                         |

|               |                                                                                                                     |                                                                                                  |                                                                                                                                                                                                             |
|---------------|---------------------------------------------------------------------------------------------------------------------|--------------------------------------------------------------------------------------------------|-------------------------------------------------------------------------------------------------------------------------------------------------------------------------------------------------------------|
|               | Avoidance of lines, drains and urinary catheters.                                                                   |                                                                                                  |                                                                                                                                                                                                             |
|               | Delayed clamping of the umbilical cord on delivery of the baby                                                      | Increases blood flow from the placenta into the baby.                                            | Reduced incidence of anaemia in baby.                                                                                                                                                                       |
|               | Skin to skin contact at birth                                                                                       | Improves mother and baby bonding                                                                 | Early start of breastfeeding → <b>Reduced LoS</b>                                                                                                                                                           |
| Postoperative | Analgesia controlled with oral medication – regular paracetamol and brufen with oral morphine for breakthrough pain | Reduces the need for morphine injections to control pain                                         | Fewer side effects from morphine injections which might prevent the mother from getting out of bed. Early mobilisation → <b>Reduced LoS</b>                                                                 |
|               | Early removal of urinary catheters.                                                                                 | Reduces the chance of developing a urinary tract infection.                                      | Reduced rate of urinary tract infection. Also allows for earlier mobilization → <b>Reduced LoS</b>                                                                                                          |
|               | Early oral intake                                                                                                   | Maintains the mother's blood glucose levels so that muscle is not broken down to provide energy. | Fewer postoperative infections and less breakdown of muscle protein. There are also reduced feelings of hunger and thirst and patients are less anxious. Early return of gut function. → <b>Reduced LoS</b> |
|               | Early mobilization                                                                                                  | Prevents muscle wasting and encourages the flow of blood in the legs.                            | Fewer blood clots in legs and lungs and improved lung and gut function. Early return to normal function. → <b>Reduced LoS</b>                                                                               |
|               | Chewing gum                                                                                                         | Stimulates bowel movements after abdominal surgery.                                              | Early return of bowel function. Early return of normal function → <b>Reduced LoS</b>                                                                                                                        |
