# Supplementary material for: Enhanced recovery after elective caesarean: a rapid review of clinical protocols, and an umbrella review of systematic reviews
Source: Springer Nature journal article supplement (doi:10.1186/s12884-017-1265-0), 2017-03-20
Supplement: MOESM10 [file 12157630]

**Intervention components**

**Mechanism of action**  
(see Additional file 11-Table 7)

**Intermediate outcomes**

**Final outcomes**

Pre-operative

Intra-operative

Post-operative

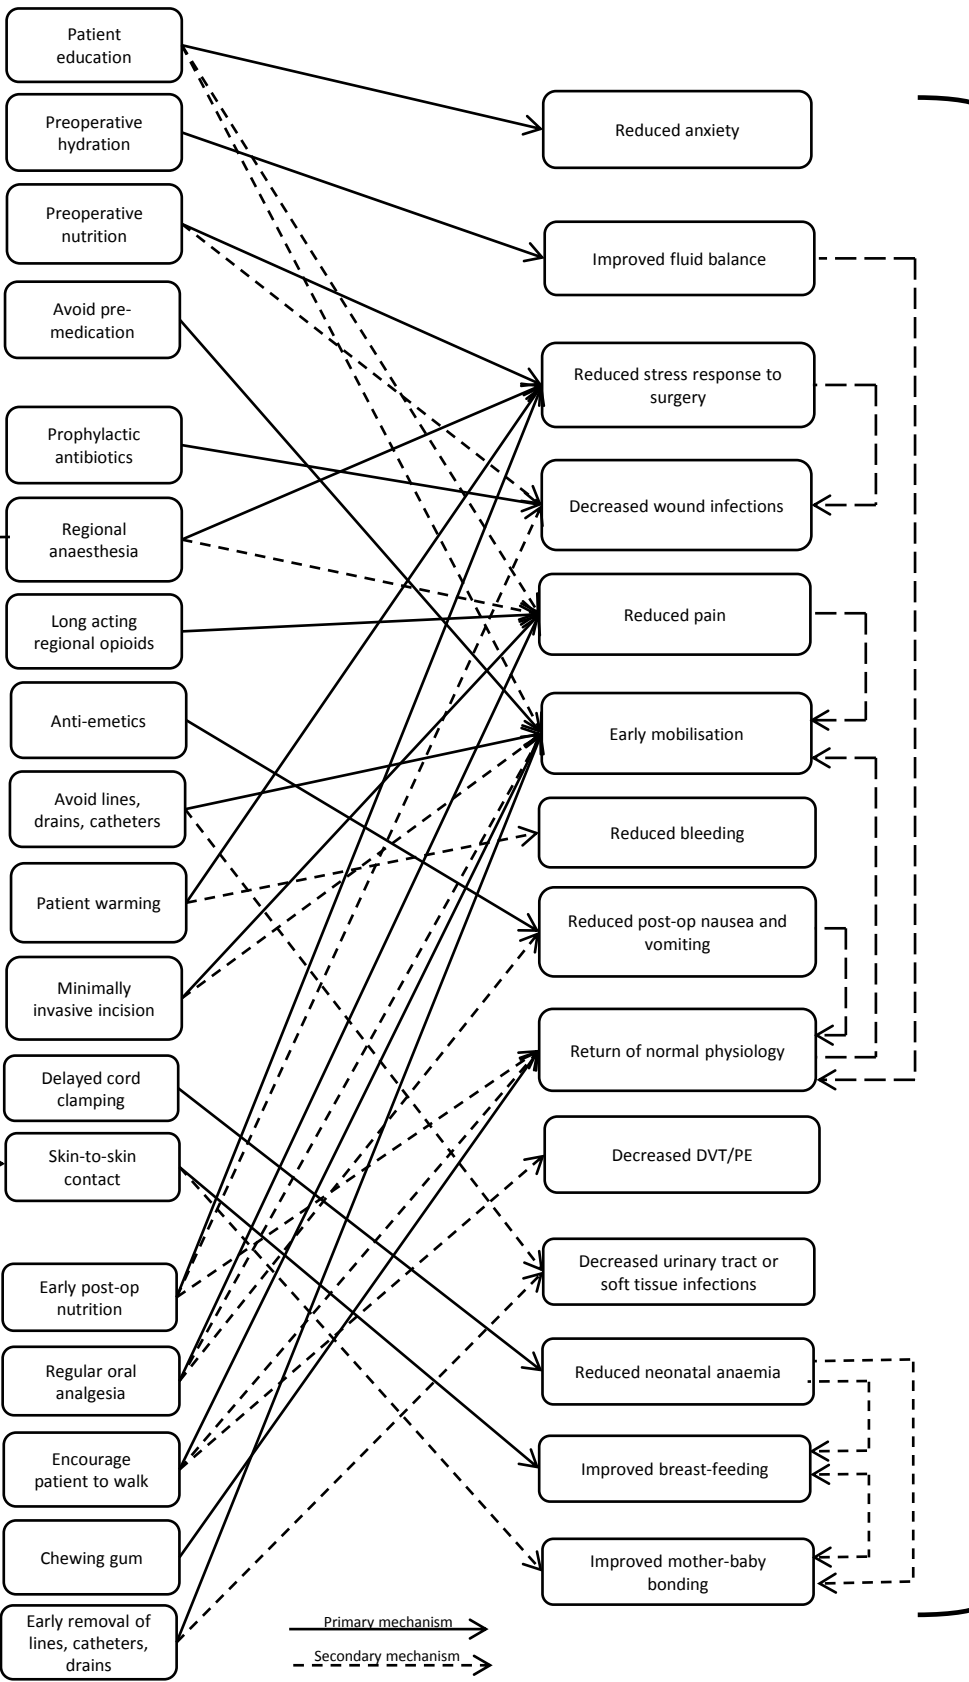

**Improved maternal outcomes**

- Reduced mortality
- Reduced post-op complications
- Improved quality of life

**Improved neonatal outcomes**

- Improved weight gain/growth
- Reduced perinatal complications

**Improved hospital efficiency**

- Reduced length of stay
- Reduced critical care admissions
